# Supplementary material for: How do people in prison access palliative care? A scoping review of models of palliative care delivery for people in prison in high-income countries
Source: PubMed Central journal article supplement (PMC11107131; doi:10.1177/02692163241242647), 2024-04-16
Supplement: sj-pdf-1-pmj-10.1177_02692163241242647.pdf [file sj-pdf-1-pmj-10.1177_02692163241242647.pdf]

|                                                                                                    |                             |                             |                             |                             |                             |                             |                             |                             |                                                                            |                                                                                                                                                        |                                                                          |                                                                                                                       |                                                                                                                                                                                                                                 |
|----------------------------------------------------------------------------------------------------|-----------------------------|-----------------------------|-----------------------------|-----------------------------|-----------------------------|-----------------------------|-----------------------------|-----------------------------|----------------------------------------------------------------------------|--------------------------------------------------------------------------------------------------------------------------------------------------------|--------------------------------------------------------------------------|-----------------------------------------------------------------------------------------------------------------------|---------------------------------------------------------------------------------------------------------------------------------------------------------------------------------------------------------------------------------|
| 1.5. Is there coherence between qualitative data sources, collection, analysis and interpretation? | Yes                         | Yes                         | Yes                         | Yes                         | Yes                         | Yes                         | Yes                         | Yes                         | Yes                                                                        | Yes                                                                                                                                                    | Yes                                                                      | Yes                                                                                                                   | Can't Tell                                                                                                                                                                                                                      |
| Rationale for score                                                                                | All screening criteria met. | All screening criteria met. | All screening criteria met. | All screening criteria met. | All screening criteria met. | All screening criteria met. | All screening criteria met. | All screening criteria met. | Data collection method of telephone surveys not as robust as face to face. | Brief phone interviews limit depth compared to face-to-face interviews. Broader representation from various staff groups is needed for a comprehensive | Study doesn't report on thematic approach utilised by the research team. | There is ambiguity in the research question, and the clarity of integrating data from the document review is lacking. | A lack of clarity in the research question, reliance on a single data collection source with measurement against pre-existing themes, an unrepresentative sample size, and the absence of methodology and analysis discussions. |

**Table 5. Quantitative Descriptive Studies**

| <b>MMAT Criteria</b>                                                         |  | <b>Hoffman et al., 2011 (USA)</b> |
|------------------------------------------------------------------------------|--|-----------------------------------|
| 4.1 Is the sampling strategy relevant to address the research question?      |  | Yes                               |
| 4.2. Is the sample representative of the target population?                  |  | Yes                               |
| 4.3. Are the measurements appropriate?                                       |  | Yes                               |
| 4.4. Is the risk of nonresponse bias low?                                    |  | Yes                               |
| 4.5 Is the statistical analysis appropriate to answer the research question? |  | Yes                               |
| Rationale for score                                                          |  | All screening criteria met.       |

**Table 6. Mixed Methods Studies**

| MMAT Criteria                                                                                              | Byock et al. 2006 (USA) | Papadopoulos et al. 2016 (UK) | Prost et al 2020 (USA) | Turner et al. 2011 (UK) | Turner et al. 2018 (UK) | Turner et al. 2021 (Multiple Countries) |
|------------------------------------------------------------------------------------------------------------|-------------------------|-------------------------------|------------------------|-------------------------|-------------------------|-----------------------------------------|
| 5.1. Is there an adequate rationale for using a mixed methods design to address the research question?     | Yes                     | Yes                           | No                     | Yes                     | Yes                     | Yes                                     |
| 5.2. Are the different components of the study effectively integrated to answer the research question?     | Yes                     | Can't Tell                    | Can't Tell             | Yes                     | Yes                     | Yes                                     |
| 5.3. Are the outputs of the integration of qualitative and quantitative components adequately interpreted? | Yes                     | Can't Tell                    | No                     | Yes                     | Yes                     | Yes                                     |

|                                                                                                                         |                             |                                                                                                                                                                                                |                                                                                                                                                                                                                                                                               |                             |                             |                                                                       |
|-------------------------------------------------------------------------------------------------------------------------|-----------------------------|------------------------------------------------------------------------------------------------------------------------------------------------------------------------------------------------|-------------------------------------------------------------------------------------------------------------------------------------------------------------------------------------------------------------------------------------------------------------------------------|-----------------------------|-----------------------------|-----------------------------------------------------------------------|
| 5.4. Are divergences and inconsistencies between quantitative and qualitative results adequately addressed?             | Yes                         | Yes                                                                                                                                                                                            | No                                                                                                                                                                                                                                                                            | Yes                         | Yes                         | Yes                                                                   |
| 5.5. Do the different components of the study adhere to the quality criteria of each tradition of the methods involved? | Yes                         | Can't Tell                                                                                                                                                                                     | Can't Tell                                                                                                                                                                                                                                                                    | Yes                         | Yes                         | Can't Tell                                                            |
| Rationale for score                                                                                                     | All screening criteria met. | Themes lacked support from verbatim quotes, limiting the meta-inference. Additionally, the qualitative component was insufficiently reported, lacking details on coding and theme development. | Ineffective integration of study components to address the research question. The handling of free text data, interpretation of outputs from integrating qualitative and quantitative components, and addressing divergences and inconsistencies were inadequately discussed. | All screening criteria met. | All screening criteria met. | No detail about thematic approach used to analyse the free text data. |

**Supplementary Material 1.** Social sciences citation index web of science search strategy

**#9 AND**

**#10 and 2000 or 2001 or 2002 or 2003 or 2004 or 2005 or 2022 or 2021 or 2020 or 2019 or 2018 or 2017 or 2016 or 2015 or 2014 or 2013 or 2012 or 2011 or 2010 or 2009 or 2008 or 2007 or 2006** (Publication Years)

**Prion\* OR Prisoner\* OR Jail\* OR Incarcerat\* OR "Correctional Facilities" OR Convict\* OR felon\* OR offender\* OR inmate\* OR penitentiari\* OR gaol** (Topic)

**"Palliative Care" OR "Terminal Care" OR Death OR "'Terminally ill" OR "Hospice Care" OR "Pain Management" OR "Advance Directive\*" OR "Advance Care Planning" OR Palliat\* OR "end-of-life" OR "terminal illness" OR dying OR "end stage illness" OR "supportive care" OR "symptom management" OR "compassionate release"** (Topic)



## Supplementary Material 2. Psycinfo search strategy

1. Palliative care.mp. or exp palliative therapy/
2. Terminal Care.mp. or exp terminal care/
3. exp death/ or Death.mp.
4. Terminally ill.mp. or exp terminally ill patient/
5. Hospice Care.mp. or exp hospice care/
6. 'Pain management'.mp.
7. 'Advance\* Directive\*.mp.
8. 'Advance\* Care Planning'.mp. or exp advance care planning/
9. Palliat\*.mp.
10. 'end of life'.mp.
11. 'end of life care'.mp.
12. 'terminal illness'.mp. or exp terminal disease/
13. dying.mp. or exp dying/
14. 'end stage illness'.mp.
15. 'supportive care'.mp.
16. 'symptom management'.mp.
17. 'compassionate release'.mp.
18. 1 or 2 or 3 or 4 or 5 or 6 or 7 or 8 or 9 or 10 or 11 or 12 or 13 or 14 or 15 or 16 or 17
19. Prison\*.mp. or exp prison/ or exp prison nursing/ or exp prisoner/

- |     |                                                                      |  |
|-----|----------------------------------------------------------------------|--|
| 20. | Criminal*.mp. or exp criminal justice/ or exp criminal behavior/     |  |
| 21. | Jail*.mp.                                                            |  |
| 22. | exp incarceration/ or Incarcerat*.mp.                                |  |
| 23. | 'Correctional Facilities'.mp. or exp correctional facility/          |  |
| 24. | convict*.mp.                                                         |  |
| 25. | felon*.mp.                                                           |  |
| 26. | exp offender/ or offender*.mp.                                       |  |
| 27. | inmate*.mp.                                                          |  |
| 28. | penitentiary*.mp.                                                    |  |
| 29. | gaol*.mp.                                                            |  |
| 30. | secure.mp.                                                           |  |
| 31. | 19 or 20 or 21 or 22 or 23 or 24 or 25 or 26 or 27 or 28 or 29 or 30 |  |
| 32. | 18 and 31                                                            |  |

**Supplementary Material 3.** CINAHL search strategy

---

|     |                                                                                                              |                                                                                                                        |                                                                                                  |         |
|-----|--------------------------------------------------------------------------------------------------------------|------------------------------------------------------------------------------------------------------------------------|--------------------------------------------------------------------------------------------------|---------|
| S57 | (S41 OR S42 OR S43 OR S44 OR S45 OR S46 OR S47 OR S48 OR S49 OR S50 OR S51 OR S52 OR S53)) AND (S40 AND S54) | Limiters - Published Date: 20000101-20221231<br>Expanders - Apply equivalent subjects<br>Search modes - Boolean/Phrase | Interface - EBSCOhost Research Databases<br>Search Screen - Advanced Search<br>Database - CINAHL | 1,394   |
| S56 | (S41 OR S42 OR S43 OR S44 OR S45 OR S46 OR S47 OR S48 OR S49 OR S50 OR S51 OR S52 OR S53)) AND (S40 AND S54) | Limiters - Published Date: 20000101-20221231<br>Expanders - Apply equivalent subjects<br>Search modes - Boolean/Phrase | Interface - EBSCOhost Research Databases<br>Search Screen - Advanced Search<br>Database - CINAHL | 1,394   |
| S55 | (S41 OR S42 OR S43 OR S44 OR S45 OR S46 OR S47 OR S48 OR S49 OR S50 OR S51 OR S52 OR S53)) AND (S40 AND S54) | Expanders - Apply equivalent subjects<br>Search modes - Boolean/Phrase                                                 | Interface - EBSCOhost Research Databases<br>Search Screen - Advanced Search<br>Database - CINAHL | Display |
| S54 | S41 OR S42 OR S43 OR S44 OR S45 OR S46 OR S47 OR S48 OR S49 OR S50 OR S51 OR S52 OR S53)                     | Expanders - Apply equivalent subjects<br>Search modes - Boolean/Phrase                                                 | Interface - EBSCOhost Research Databases<br>Search Screen - Advanced Search<br>Database - CINAHL | Display |
| S53 | "secure"                                                                                                     | Expanders - Apply equivalent subjects<br>Search modes - Boolean/Phrase                                                 | Interface - EBSCOhost Research Databases                                                         | Display |



|     |                 |                                                                        |                                                                                                     |         |
|-----|-----------------|------------------------------------------------------------------------|-----------------------------------------------------------------------------------------------------|---------|
|     |                 |                                                                        | Search Screen - Advanced Search<br>Database - CINAHL                                                |         |
| S52 | "gaol"          | Expanders - Apply equivalent subjects<br>Search modes - Boolean/Phrase | Interface - EBSCOhost Research<br>Databases<br>Search Screen - Advanced Search<br>Database - CINAHL | Display |
| S51 | "penitentiary*" | Expanders - Apply equivalent subjects<br>Search modes - Boolean/Phrase | Interface - EBSCOhost Research<br>Databases<br>Search Screen - Advanced Search<br>Database - CINAHL | Display |
| S50 | "inmate*"       | Expanders - Apply equivalent subjects<br>Search modes - Boolean/Phrase | Interface - EBSCOhost Research<br>Databases<br>Search Screen - Advanced Search<br>Database - CINAHL | Display |
| S49 | "offender*"     | Expanders - Apply equivalent subjects<br>Search modes - Boolean/Phrase | Interface - EBSCOhost Research<br>Databases<br>Search Screen - Advanced Search<br>Database - CINAHL | Display |

|     |                                |                                                                        |                                                                                                     |         |
|-----|--------------------------------|------------------------------------------------------------------------|-----------------------------------------------------------------------------------------------------|---------|
| S48 | "felon*"                       | Expanders - Apply equivalent subjects<br>Search modes - Boolean/Phrase | Interface - EBSCOhost Research<br>Databases<br>Search Screen - Advanced Search<br>Database - CINAHL | Display |
| S47 | "convict*"                     | Expanders - Apply equivalent subjects<br>Search modes - Boolean/Phrase | Interface - EBSCOhost Research<br>Databases<br>Search Screen - Advanced Search<br>Database - CINAHL | Display |
| S46 | (MH "Correctional Facilities") | Expanders - Apply equivalent subjects<br>Search modes - Boolean/Phrase | Interface - EBSCOhost Research<br>Databases<br>Search Screen - Advanced Search<br>Database - CINAHL | Display |
| S45 | "Incarcerat*"                  | Expanders - Apply equivalent subjects<br>Search modes - Boolean/Phrase | Interface - EBSCOhost Research<br>Databases<br>Search Screen - Advanced Search<br>Database - CINAHL | Display |
| S44 | "Jail*"                        | Expanders - Apply equivalent subjects<br>Search modes - Boolean/Phrase | Interface - EBSCOhost Research<br>Databases                                                         | Display |

|     |                                                                                                                                               |                                                                        |                                                                                                     |         |
|-----|-----------------------------------------------------------------------------------------------------------------------------------------------|------------------------------------------------------------------------|-----------------------------------------------------------------------------------------------------|---------|
|     |                                                                                                                                               |                                                                        | Search Screen - Advanced Search<br>Database - CINAHL                                                |         |
| S43 | "Criminal*"                                                                                                                                   | Expanders - Apply equivalent subjects<br>Search modes - Boolean/Phrase | Interface - EBSCOhost Research<br>Databases<br>Search Screen - Advanced Search<br>Database - CINAHL | Display |
| S42 | (MH "Prisoners")                                                                                                                              | Expanders - Apply equivalent subjects<br>Search modes - Boolean/Phrase | Interface - EBSCOhost Research<br>Databases<br>Search Screen - Advanced Search<br>Database - CINAHL | Display |
| S41 | "Prison*"                                                                                                                                     | Expanders - Apply equivalent subjects<br>Search modes - Boolean/Phrase | Interface - EBSCOhost Research<br>Databases<br>Search Screen - Advanced Search<br>Database - CINAHL | Display |
| S40 | S21 OR S22 OR S23 OR S24 OR S25<br>OR S26 OR S27 OR S28 OR S29 OR<br>S30 OR S31 OR S32 OR S33 OR S34<br>OR S35 OR S36 OR S37 OR S38 OR<br>S39 | Expanders - Apply equivalent subjects<br>Search modes - Boolean/Phrase | Interface - EBSCOhost Research<br>Databases<br>Search Screen - Advanced Search<br>Database - CINAHL | 177,157 |

|     |                         |                                                                        |                                                                                                     |         |
|-----|-------------------------|------------------------------------------------------------------------|-----------------------------------------------------------------------------------------------------|---------|
| S39 | "compassionate release" | Expanders - Apply equivalent subjects<br>Search modes - Boolean/Phrase | Interface - EBSCOhost Research<br>Databases<br>Search Screen - Advanced Search<br>Database - CINAHL | Display |
| S38 | "symptom management"    | Expanders - Apply equivalent subjects<br>Search modes - Boolean/Phrase | Interface - EBSCOhost Research<br>Databases<br>Search Screen - Advanced Search<br>Database - CINAHL | Display |
| S37 | "supportive care"       | Expanders - Apply equivalent subjects<br>Search modes - Boolean/Phrase | Interface - EBSCOhost Research<br>Databases<br>Search Screen - Advanced Search<br>Database - CINAHL | Display |
| S36 | "end stage illness"     | Expanders - Apply equivalent subjects<br>Search modes - Boolean/Phrase | Interface - EBSCOhost Research<br>Databases<br>Search Screen - Advanced Search<br>Database - CINAHL | Display |
| S35 | "dying"                 | Expanders - Apply equivalent subjects<br>Search modes - Boolean/Phrase | Interface - EBSCOhost Research<br>Databases                                                         | Display |

|     |                    |                                                                        |                                                                                                     |         |
|-----|--------------------|------------------------------------------------------------------------|-----------------------------------------------------------------------------------------------------|---------|
|     |                    |                                                                        | Search Screen - Advanced Search<br>Database - CINAHL                                                |         |
| S34 | dying              | Expanders - Apply equivalent subjects<br>Search modes - Boolean/Phrase | Interface - EBSCOhost Research<br>Databases<br>Search Screen - Advanced Search<br>Database - CINAHL | Display |
| S33 | "terminal illness" | Expanders - Apply equivalent subjects<br>Search modes - Boolean/Phrase | Interface - EBSCOhost Research<br>Databases<br>Search Screen - Advanced Search<br>Database - CINAHL | Display |
| S32 | "end-of-life care" | Expanders - Apply equivalent subjects<br>Search modes - Boolean/Phrase | Interface - EBSCOhost Research<br>Databases<br>Search Screen - Advanced Search<br>Database - CINAHL | Display |
| S31 | "end-of-life"      | Expanders - Apply equivalent subjects<br>Search modes - Boolean/Phrase | Interface - EBSCOhost Research<br>Databases<br>Search Screen - Advanced Search<br>Database - CINAHL | Display |

|     |                              |                                                                        |                                                                                                     |         |
|-----|------------------------------|------------------------------------------------------------------------|-----------------------------------------------------------------------------------------------------|---------|
| S30 | "Palliat*"                   | Expanders - Apply equivalent subjects<br>Search modes - Boolean/Phrase | Interface - EBSCOhost Research<br>Databases<br>Search Screen - Advanced Search<br>Database - CINAHL | Display |
| S29 | (MH "Advance Care Planning") | Expanders - Apply equivalent subjects<br>Search modes - Boolean/Phrase | Interface - EBSCOhost Research<br>Databases<br>Search Screen - Advanced Search<br>Database - CINAHL | Display |
| S28 | (MH "Advance Directives+")   | Expanders - Apply equivalent subjects<br>Search modes - Boolean/Phrase | Interface - EBSCOhost Research<br>Databases<br>Search Screen - Advanced Search<br>Database - CINAHL | Display |
| S27 | (MH "Pain Management")       | Expanders - Apply equivalent subjects<br>Search modes - Boolean/Phrase | Interface - EBSCOhost Research<br>Databases<br>Search Screen - Advanced Search<br>Database - CINAHL | Display |
| S26 | (MH "Hospice Care")          | Expanders - Apply equivalent subjects<br>Search modes - Boolean/Phrase | Interface - EBSCOhost Research<br>Databases                                                         | Display |

|     |                                 |                                                                        |                                                                                                     |         |
|-----|---------------------------------|------------------------------------------------------------------------|-----------------------------------------------------------------------------------------------------|---------|
|     |                                 |                                                                        | Search Screen - Advanced Search<br>Database - CINAHL                                                |         |
| S25 | Terminally ill                  | Expanders - Apply equivalent subjects<br>Search modes - Boolean/Phrase | Interface - EBSCOhost Research<br>Databases<br>Search Screen - Advanced Search<br>Database - CINAHL | Display |
| S24 | (MH "Terminally Ill Patients+") | Expanders - Apply equivalent subjects<br>Search modes - Boolean/Phrase | Interface - EBSCOhost Research<br>Databases<br>Search Screen - Advanced Search<br>Database - CINAHL | Display |
| S23 | (MH "Death+")                   | Expanders - Apply equivalent subjects<br>Search modes - Boolean/Phrase | Interface - EBSCOhost Research<br>Databases<br>Search Screen - Advanced Search<br>Database - CINAHL | Display |
| S22 | (MH "Terminal Care+")           | Expanders - Apply equivalent subjects<br>Search modes - Boolean/Phrase | Interface - EBSCOhost Research<br>Databases<br>Search Screen - Advanced Search<br>Database - CINAHL | Display |

|     |                                                                                                                                                                         |                                                                        |                                                                                                     |         |
|-----|-------------------------------------------------------------------------------------------------------------------------------------------------------------------------|------------------------------------------------------------------------|-----------------------------------------------------------------------------------------------------|---------|
| S21 | (MH "Palliative Care")                                                                                                                                                  | Expanders - Apply equivalent subjects<br>Search modes - Boolean/Phrase | Interface - EBSCOhost Research<br>Databases<br>Search Screen - Advanced Search<br>Database - CINAHL | Display |
| S20 | ((AB dying OR AB 'end stage illness'<br>OR AB 'supportive care' OR AB<br>'symptom management' OR AB<br>'compassionate release') AND (S17<br>AND S18)) AND (S16 AND S19) | Expanders - Apply equivalent subjects<br>Search modes - Boolean/Phrase | Interface - EBSCOhost Research<br>Databases<br>Search Screen - Advanced Search<br>Database - CINAHL | 149     |
| S19 | (AB dying OR AB 'end stage illness'<br>OR AB 'supportive care' OR AB<br>'symptom management' OR AB<br>'compassionate release') AND (S17<br>AND S18)                     | Expanders - Apply equivalent subjects<br>Search modes - Boolean/Phrase | Interface - EBSCOhost Research<br>Databases<br>Search Screen - Advanced Search<br>Database - CINAHL | 13,174  |
| S18 | AB dying OR AB 'end stage illness'<br>OR AB 'supportive care' OR AB<br>'symptom management' OR AB<br>'compassionate release'                                            | Expanders - Apply equivalent subjects<br>Search modes - Boolean/Phrase | Interface - EBSCOhost Research<br>Databases<br>Search Screen - Advanced Search<br>Database - CINAHL | 29,549  |



|                                                                                                                                                                                                                                                                         |                                                                        |                                                                                               |         |
|-------------------------------------------------------------------------------------------------------------------------------------------------------------------------------------------------------------------------------------------------------------------------|------------------------------------------------------------------------|-----------------------------------------------------------------------------------------------|---------|
| S17 AB palliative care OR AB terminal care OR AB death OR AB terminally ill OR AB hospice care OR AB 'pain management' OR AB advance* directives OR AB advance care planning OR AB Palliat* OR AB end-of-life OR AB 'end of life care' OR AB terminal illness           | Expanders - Apply equivalent subjects<br>Search modes - Boolean/Phrase | Interface - EBSCOhost Research Databases<br>Search Screen - Advanced Search Database - CINAHL | 235,860 |
| S16 AB ( (MH "Prisoners") OR (MH "Correctional Facilities") OR (MH "Correctional Health Services") ) OR AB criminal* OR AB jail* OR AB convict* OR AB felon* OR AB offender* OR AB inmate* OR AB penitentiary* OR AB incarcerat* OR AB gaol* OR AB secure OR AB prison* | Expanders - Apply equivalent subjects<br>Search modes - Boolean/Phrase | Interface - EBSCOhost Research Databases<br>Search Screen - Advanced Search Database - CINAHL | 40,659  |
| S15 ((AB dying OR AB 'end stage illness' OR AB 'supportive care' OR AB 'symptom management' OR AB                                                                                                                                                                       | Expanders - Apply equivalent subjects<br>Search modes - Boolean/Phrase | Interface - EBSCOhost Research Databases                                                      | 149     |

|     |                                                                                                                                                                                                                                                           |                                                                        |                                                                                               |         |
|-----|-----------------------------------------------------------------------------------------------------------------------------------------------------------------------------------------------------------------------------------------------------------|------------------------------------------------------------------------|-----------------------------------------------------------------------------------------------|---------|
|     | 'compassionate release') AND (S12 AND S13)) AND (S11 AND S14)                                                                                                                                                                                             |                                                                        | Search Screen - Advanced Search Database - CINAHL                                             |         |
| S14 | (AB dying OR AB 'end stage illness' OR AB 'supportive care' OR AB 'symptom management' OR AB 'compassionate release') AND (S12 AND S13)                                                                                                                   | Expanders - Apply equivalent subjects<br>Search modes - Boolean/Phrase | Interface - EBSCOhost Research Databases<br>Search Screen - Advanced Search Database - CINAHL | 13,174  |
| S13 | AB dying OR AB 'end stage illness' OR AB 'supportive care' OR AB 'symptom management' OR AB 'compassionate release'                                                                                                                                       | Expanders - Apply equivalent subjects<br>Search modes - Boolean/Phrase | Interface - EBSCOhost Research Databases<br>Search Screen - Advanced Search Database - CINAHL | 29,549  |
| S12 | AB palliative care OR AB terminal care OR AB death OR AB terminally ill OR AB hospice care OR AB 'pain management' OR AB advance* directives OR AB advance care planning OR AB Palliat* OR AB end-of-life OR AB 'end of life care' OR AB terminal illness | Expanders - Apply equivalent subjects<br>Search modes - Boolean/Phrase | Interface - EBSCOhost Research Databases<br>Search Screen - Advanced Search Database - CINAHL | 235,860 |

|                                                                                                                                                                                                                                                                                  |                                                                                |                                                                                                           |               |
|----------------------------------------------------------------------------------------------------------------------------------------------------------------------------------------------------------------------------------------------------------------------------------|--------------------------------------------------------------------------------|-----------------------------------------------------------------------------------------------------------|---------------|
| <p>S11 AB ( (MH "Prisoners") OR (MH "Correctional Facilities") OR (MH "Correctional Health Services") ) OR AB criminal* OR AB jail* OR AB convict* OR AB felon* OR AB offender* OR AB inmate* OR AB penitentiary* OR AB incarcerated* OR AB gaol* OR AB secure OR AB prison*</p> | <p>Expanders - Apply equivalent subjects<br/>Search modes - Boolean/Phrase</p> | <p>Interface - EBSCOhost Research Databases<br/>Search Screen - Advanced Search<br/>Database - CINAHL</p> | <p>40,659</p> |
| <p>S10 ((AB dying OR AB 'end stage illness' OR AB 'supportive care' OR AB 'symptom management' OR AB 'compassionate release') AND (S7 AND S8)) AND (S6 AND S9)</p>                                                                                                               | <p>Expanders - Apply equivalent subjects<br/>Search modes - Boolean/Phrase</p> | <p>Interface - EBSCOhost Research Databases<br/>Search Screen - Advanced Search<br/>Database - CINAHL</p> | <p>149</p>    |
| <p>S9 (AB dying OR AB 'end stage illness' OR AB 'supportive care' OR AB 'symptom management' OR AB 'compassionate release') AND (S7 AND S8)</p>                                                                                                                                  | <p>Expanders - Apply equivalent subjects<br/>Search modes - Boolean/Phrase</p> | <p>Interface - EBSCOhost Research Databases<br/>Search Screen - Advanced Search<br/>Database - CINAHL</p> | <p>13,174</p> |

|    |                                                                                                                                                                                                                                                                                 |                                                                        |                                                                                                     |         |
|----|---------------------------------------------------------------------------------------------------------------------------------------------------------------------------------------------------------------------------------------------------------------------------------|------------------------------------------------------------------------|-----------------------------------------------------------------------------------------------------|---------|
| S8 | AB dying OR AB 'end stage illness'<br>OR AB 'supportive care' OR AB<br>'symptom management' OR AB<br>'compassionate release'                                                                                                                                                    | Expanders - Apply equivalent subjects<br>Search modes - Boolean/Phrase | Interface - EBSCOhost Research<br>Databases<br>Search Screen - Advanced Search<br>Database - CINAHL | 29,549  |
| S7 | AB palliative care OR AB terminal<br>care OR AB death OR AB terminally<br>ill OR AB hospice care OR AB 'pain<br>management' OR AB advance*<br>directives OR AB advance care<br>planning OR AB Palliat* OR AB end-<br>of-life OR AB 'end of life care' OR AB<br>terminal illness | Expanders - Apply equivalent subjects<br>Search modes - Boolean/Phrase | Interface - EBSCOhost Research<br>Databases<br>Search Screen - Advanced Search<br>Database - CINAHL | 235,860 |
| S6 | AB ( (MH "Prisoners") OR (MH<br>"Correctional Facilities") OR (MH<br>"Correctional Health Services") ) OR<br>AB criminal* OR AB jail* OR AB<br>convict* OR AB felon* OR AB<br>offender* OR AB inmate* OR AB<br>penitentiary* OR AB incarcerat* OR                               | Expanders - Apply equivalent subjects<br>Search modes - Boolean/Phrase | Interface - EBSCOhost Research<br>Databases<br>Search Screen - Advanced Search<br>Database - CINAHL | 40,659  |

AB gaol\* OR AB secure OR AB  
prison\*

|    |                                                                                                                                                                     |                                                                        |                                                                                                     |         |
|----|---------------------------------------------------------------------------------------------------------------------------------------------------------------------|------------------------------------------------------------------------|-----------------------------------------------------------------------------------------------------|---------|
| S5 | ((AB dying OR AB 'end stage illness'<br>OR AB 'supportive care' OR AB<br>'symptom management' OR AB<br>'compassionate release') AND (S2<br>AND S3)) AND (S1 AND S4) | Expanders - Apply equivalent subjects<br>Search modes - Boolean/Phrase | Interface - EBSCOhost Research<br>Databases<br>Search Screen - Advanced Search<br>Database - CINAHL | 149     |
| S4 | (AB dying OR AB 'end stage illness'<br>OR AB 'supportive care' OR AB<br>'symptom management' OR AB<br>'compassionate release') AND (S2<br>AND S3)                   | Expanders - Apply equivalent subjects<br>Search modes - Boolean/Phrase | Interface - EBSCOhost Research<br>Databases<br>Search Screen - Advanced Search<br>Database - CINAHL | 13,174  |
| S3 | AB dying OR AB 'end stage illness'<br>OR AB 'supportive care' OR AB<br>'symptom management' OR AB<br>'compassionate release'                                        | Expanders - Apply equivalent subjects<br>Search modes - Boolean/Phrase | Interface - EBSCOhost Research<br>Databases<br>Search Screen - Advanced Search<br>Database - CINAHL | 29,549  |
| S2 | AB palliative care OR AB terminal<br>care OR AB death OR AB terminally<br>ill OR AB hospice care OR AB 'pain                                                        | Expanders - Apply equivalent subjects<br>Search modes - Boolean/Phrase | Interface - EBSCOhost Research<br>Databases                                                         | 235,860 |

management' OR AB advance\*  
directives OR AB advance care  
planning OR AB Palliat\* OR AB end-  
of-life OR AB 'end of life care' OR AB  
terminal illness

Search Screen - Advanced Search  
Database - CINAHL

|    |                                                                                                                                                                                                                                                                                             |                                                                        |                                                                                                     |        |
|----|---------------------------------------------------------------------------------------------------------------------------------------------------------------------------------------------------------------------------------------------------------------------------------------------|------------------------------------------------------------------------|-----------------------------------------------------------------------------------------------------|--------|
| S1 | AB ( (MH "Prisoners") OR (MH<br>"Correctional Facilities") OR (MH<br>"Correctional Health Services") ) OR<br>AB criminal* OR AB jail* OR AB<br>convict* OR AB felon* OR AB<br>offender* OR AB inmate* OR AB<br>penitentiary* OR AB incarcerat* OR<br>AB gaol* OR AB secure OR AB<br>prison* | Expanders - Apply equivalent subjects<br>Search modes - Boolean/Phrase | Interface - EBSCOhost Research<br>Databases<br>Search Screen - Advanced Search<br>Database - CINAHL | 40,659 |
|----|---------------------------------------------------------------------------------------------------------------------------------------------------------------------------------------------------------------------------------------------------------------------------------------------|------------------------------------------------------------------------|-----------------------------------------------------------------------------------------------------|--------|

---

**Supplementary Material 4. PSYCHINFO final search**

|     |                                                                                           |  |  |  |  |
|-----|-------------------------------------------------------------------------------------------|--|--|--|--|
| 1.  | Palliative care.mp. or exp palliative therapy/                                            |  |  |  |  |
| 2.  | Terminal Care.mp. or exp terminal care/                                                   |  |  |  |  |
| 3.  | exp death/ or Death.mp.                                                                   |  |  |  |  |
| 4.  | Terminally ill.mp. or exp terminally ill patient/                                         |  |  |  |  |
| 5.  | Hospice Care.mp. or exp hospice care/                                                     |  |  |  |  |
| 6.  | 'Pain management'.mp.                                                                     |  |  |  |  |
| 7.  | 'Advance* Directive*'.mp.                                                                 |  |  |  |  |
| 8.  | 'Advance* Care Planning'.mp. or exp advance care planning/                                |  |  |  |  |
| 9.  | Palliat*.mp.                                                                              |  |  |  |  |
| 10. | 'end of life'.mp.                                                                         |  |  |  |  |
| 11. | 'end of life care'.mp.                                                                    |  |  |  |  |
| 12. | 'terminal illness'.mp. or exp terminal disease/                                           |  |  |  |  |
| 13. | dying.mp. or exp dying/                                                                   |  |  |  |  |
| 14. | 'end stage illness'.mp.                                                                   |  |  |  |  |
| 15. | 'supportive care'.mp.                                                                     |  |  |  |  |
| 16. | 'symptom management'.mp.                                                                  |  |  |  |  |
| 17. | 'compassionate release'.mp.                                                               |  |  |  |  |
| 18. | 1 or 2 or 3 or 4 or 5 or 6 or 7 or 8 or 9 or 10 or 11 or 12 or 13 or 14 or 15 or 16 or 17 |  |  |  |  |

|     |                                                                         |  |  |  |  |
|-----|-------------------------------------------------------------------------|--|--|--|--|
| 19. | Prison*.mp. or exp prison/ or exp prison nursing/<br>or exp prisoner/   |  |  |  |  |
| 20. | Criminal*.mp. or exp criminal justice/ or exp<br>criminal behavior/     |  |  |  |  |
| 21. | Jail*.mp.                                                               |  |  |  |  |
| 22. | exp incarceration/ or Incarcerat*.mp.                                   |  |  |  |  |
| 23. | 'Correctional Facilities'.mp. or exp correctional<br>facility/          |  |  |  |  |
| 24. | convict*.mp.                                                            |  |  |  |  |
| 25. | felon*.mp.                                                              |  |  |  |  |
| 26. | exp offender/ or offender*.mp.                                          |  |  |  |  |
| 27. | inmate*.mp.                                                             |  |  |  |  |
| 28. | penitentiary*.mp.                                                       |  |  |  |  |
| 29. | gaol*.mp.                                                               |  |  |  |  |
| 30. | secure.mp.                                                              |  |  |  |  |
| 31. | 19 or 20 or 21 or 22 or 23 or 24 or 25 or 26 or 27<br>or 28 or 29 or 30 |  |  |  |  |
| 32. | 18 and 31                                                               |  |  |  |  |



**Supplementary Material 5.** EMBASE search strategy

| #  | Query                       | Results from 10<br>Dec 2021 |
|----|-----------------------------|-----------------------------|
| 1  | exp palliative therapy/     | 123,114                     |
| 2  | exp terminal care/          | 75,351                      |
| 3  | exp death/                  | 759,351                     |
| 4  | exp terminally ill patient/ | 9,036                       |
| 5  | exp hospice care/           | 11,520                      |
| 6  | "pain management".mp.       | 43,759                      |
| 7  | 'advance directives'.mp.    | 4,797                       |
| 8  | exp advance care planning/  | 4,222                       |
| 9  | Palliat*.mp.                | 175,448                     |
| 10 | "end-of-life".mp.           | 40,184                      |
| 11 | "end-of-life care".mp.      | 17,734                      |
| 12 | exp terminal disease/       | 6,724                       |
| 13 | "terminal illness".mp.      | 2,803                       |
| 14 | exp dying/                  | 9,567                       |
| 15 | "end stage illness".mp.     | 40                          |
| 16 | "supportive care".mp.       | 34,503                      |

|    |                                                     |           |
|----|-----------------------------------------------------|-----------|
| 17 | "symptom management".mp.                            | 10,031    |
| 18 | "compassionate release".mp.                         | 49        |
| 19 | Palliative care.mp.                                 | 56,754    |
| 20 | Terminal care.mp.                                   | 39,269    |
| 21 | death.mp.                                           | 1,391,485 |
| 22 | terminally ill.mp.                                  | 12,347    |
| 23 | hospice care.mp.                                    | 13,167    |
| 24 | exp hospice/                                        | 14,572    |
| 25 | advance care planning.mp. or advance care planning/ | 6,901     |
| 26 | dying.mp.                                           | 52,644    |
| 27 | prisoner/ or prison/                                | 28,044    |
| 28 | prison.mp.                                          | 21,019    |
| 29 | prisoner.mp.                                        | 18,532    |
| 30 | Criminal*.mp.                                       | 40,633    |
| 31 | Jail*.mp.                                           | 4,756     |
| 32 | Incarcerat*.mp.                                     | 16,675    |
| 33 | correctional facility/                              | 1,068     |
| 34 | exp correctional facility/                          | 1,391     |
| 35 | convict*.mp.                                        | 9,041     |

|    |                                                                                                                                                 |           |
|----|-------------------------------------------------------------------------------------------------------------------------------------------------|-----------|
| 36 | felon*.mp.                                                                                                                                      | 996       |
| 37 | exp offender/                                                                                                                                   | 14,938    |
| 38 | offender.mp.                                                                                                                                    | 18,336    |
| 39 | inmate*.mp.                                                                                                                                     | 6,415     |
| 40 | penitentiary*.mp.                                                                                                                               | 848       |
| 41 | gaol*.mp.                                                                                                                                       | 179       |
| 42 | 1 or 2 or 3 or 4 or 5 or 6 or 7 or 8 or 9 or 10 or 11 or 12 or 13 or 14 or 15 or 16 or 17 or 18 or 19 or 20 or 21 or 22 or 23 or 24 or 25 or 26 | 1,866,709 |
| 43 | 27 or 28 or 29 or 30 or 31 or 32 or 33 or 34 or 35 or 36 or 37 or 38 or 39 or 40 or 41                                                          | 95,613    |
| 44 | 42 and 43                                                                                                                                       | 9,216     |
| 45 | limit 44 to yr="2000 -Current"                                                                                                                  | 6,992     |

### Supplementary Material 6. Data Extraction Template

|                                                |
|------------------------------------------------|
| Title                                          |
| Type of study                                  |
| Lead author info                               |
| Prison category or type                        |
| Country                                        |
| Participants (details e.g. age/sex and number) |

|                                                                                                                                                                                                                  |
|------------------------------------------------------------------------------------------------------------------------------------------------------------------------------------------------------------------|
|                                                                                                                                                                                                                  |
| Who delivers the care (volunteer, prison nurse, specialist in-reach professional etc, interdisciplinary team etc)                                                                                                |
| Where does the care take place?                                                                                                                                                                                  |
| How are social care needs considered?                                                                                                                                                                            |
| how are psychological needs considered? (needs essential to mental health/ not a biological necessity)                                                                                                           |
| how are spiritual needs considered?                                                                                                                                                                              |
| What is the admission criteria for hospice or palliative care?                                                                                                                                                   |
| What opportunities are there for multi-disciplinary and partnership working? Who are the partners?                                                                                                               |
| Is there any evidence of specialist provision for older prisoners?                                                                                                                                               |
| Can you describe the intervention/interventions delivered in this model? Has any consideration been given to the need for specialist palliative care (ie care that can't be delivered by the current care team)? |
| What prison policies are in place to support the care – eg visitation policies, Release On Temporary Licence and Early Release on Compassionate Grounds discussed?                                               |
| Are the rights of prisoners' families or loved ones taken into consideration?                                                                                                                                    |
| Is bereavement support offered to fellow prisoners, loved ones or prison staff?                                                                                                                                  |
| What are the outcomes and benefits to prisoners or stakeholders of this model?                                                                                                                                   |
| What are the facilitators and challenges of delivering this model?                                                                                                                                               |

What are the funding implications of delivering EOL care in the prison setting? Is it discussed?

**Table 2. MEDLINE search strategy**

| <b>MEDLINE Search Strategy</b> |                        |
|--------------------------------|------------------------|
| 1                              | Palliative Care/       |
| 2                              | Terminal Care/         |
| 3                              | Death/                 |
| 4                              | Terminally Ill/        |
| 5                              | Hospice Care/          |
| 6                              | Pain Management/       |
| 7                              | Advance Directives/    |
| 8                              | Advance Care Planning/ |
| 10                             | Palliat*.mp.           |
| 11                             | end of life.mp.        |
| 12                             | end of life care.mp.   |
| 13                             | terminal illness.mp.   |
| 14                             | dying.mp.              |

|    |                                                                                                    |
|----|----------------------------------------------------------------------------------------------------|
| 15 | end stage illness.mp.                                                                              |
| 16 | supportive care.mp.                                                                                |
| 17 | symptom management.mp.                                                                             |
| 18 | compassionate release.mp.                                                                          |
| 19 | 1 or 2 or 3 or 4 or 5 or 6 or 7 or 8 or 9 or 10 or 11 or 12 or 13<br>or 14 or 15 or 16 or 17 or 18 |
| 20 | People in prison/ or Prisons/                                                                      |
| 21 | Criminals/                                                                                         |
| 22 | Jails/                                                                                             |
| 23 | Incarcerat*.mp.                                                                                    |
| 23 | Correctional Facilities/                                                                           |
| 24 | convict*.mp.                                                                                       |
| 25 | felon*.mp.                                                                                         |
| 26 | offender*.mp.                                                                                      |
| 27 | inmate*.mp.                                                                                        |
| 28 | penitentiary*.mp. [                                                                                |
| 29 | gaol.mp.                                                                                           |
| 30 | secure.mp.                                                                                         |
| 31 | 20 or 21 or 22 or 23 or 24 or 25 or 26 or 27 or 28 or 29 or 30                                     |

|    |           |
|----|-----------|
| 32 | 19 and 31 |
|----|-----------|
